# Supplementary material for: Interface metallization enabled an ultra-stable Fe2O3 hierarchical anode for pseudocapacitors
Source: Royal Society of Chemistry journal article supplement (doi:10.1039/c9ra10285j), 2020-01-01
Supplement: c9ra10285j1.pdf [file c9ra10285j1.pdf]

## Electronic Supplementary Information

### Interface metallization enabled ultra-Stable Fe<sub>2</sub>O<sub>3</sub> hierarchical anode for pseudocapacitors

Songyang Su<sup>†, a</sup>, Lu Shi<sup>†, a</sup>, Wentao Yao<sup>†, a</sup>, Yang Wang<sup>b</sup>, Peichao Zou<sup>a</sup>, Kangwei Liu<sup>a</sup>, Min Wang<sup>a</sup>, Feiyu Kang<sup>c</sup>, and Cheng Yang<sup>\*, a</sup>

<sup>a</sup> Division of Energy and Environment, International Graduate School at Shenzhen, Tsinghua University, Shenzhen 518055, China

<sup>b</sup> State Key Laboratory of Electronic Thin Films and Integrated Devices, School of Optoelectronic Information, University of Electronic Science and Technology of China (UESTC), Chengdu 610054, P. R. China

<sup>c</sup> School of Materials Science and Engineering, Tsinghua University, Beijing 100084, China

<sup>†</sup> These authors contributed equally to this work.

\*Corresponding author e-mail address: yang.cheng@sz.tsinghua.edu.cn.

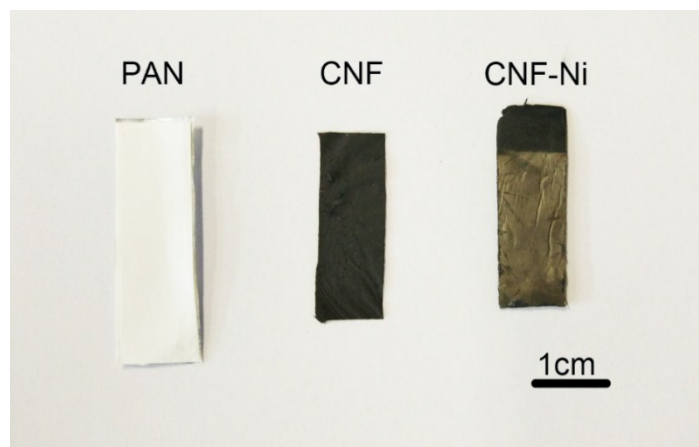

**Figure S1** Optical photos of PAN, CNF and CNF-Ni films, respectively.

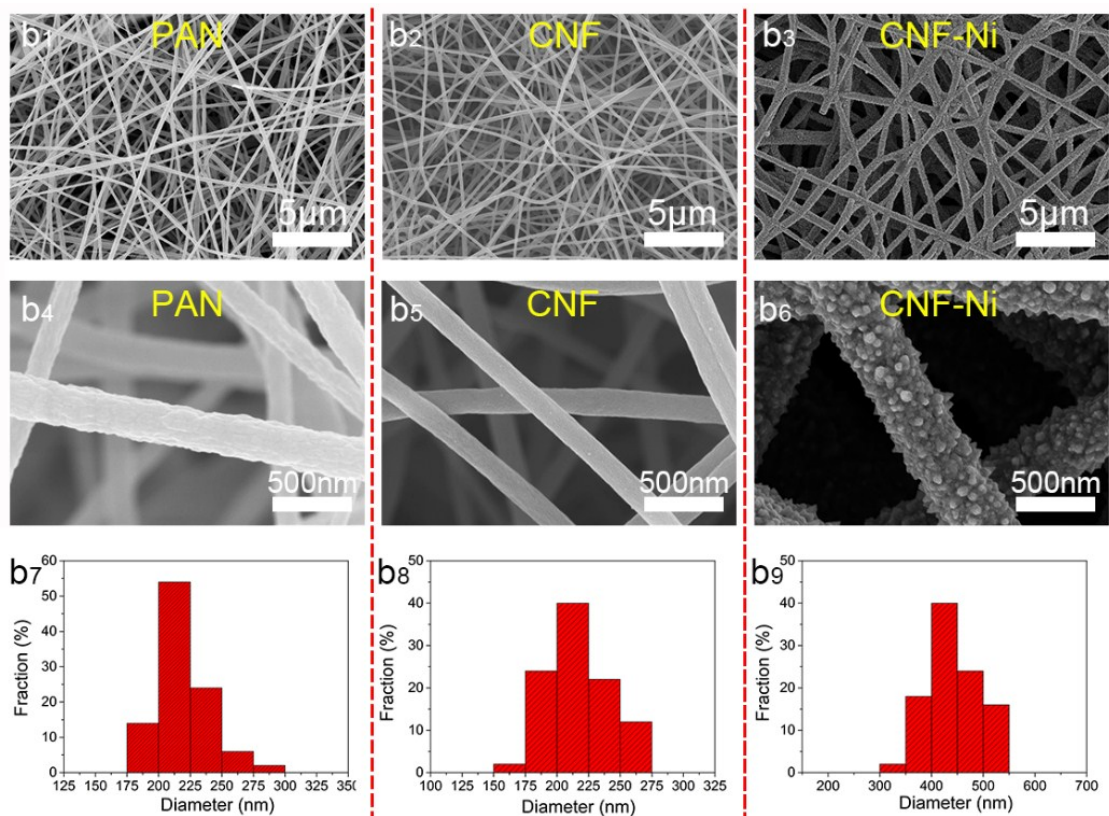

**Figure S2** SEM images of the fibers film: b<sub>1-3</sub>) SEM images of PAN, CNF, and CNF-Ni, respectively; b<sub>4-6</sub>) their enlarged SEM images, respectively; b<sub>7-9</sub>) their diameter distribution graphs, respectively.

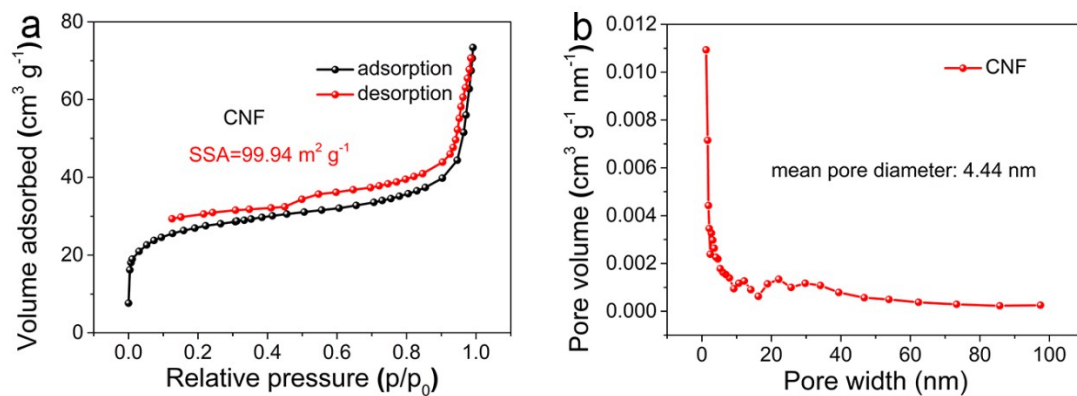

**Figure S3** (a) Adsorption isotherm curves of the CNF films. The SSAs are calculated as  $99.94 \text{ m}^2 \text{ g}^{-1}$ . (b) BJH pore size distribution plot of the CNF film, its pore size distribution is in the range of 1 - 10 nm with an average pore size of 4.44 nm.

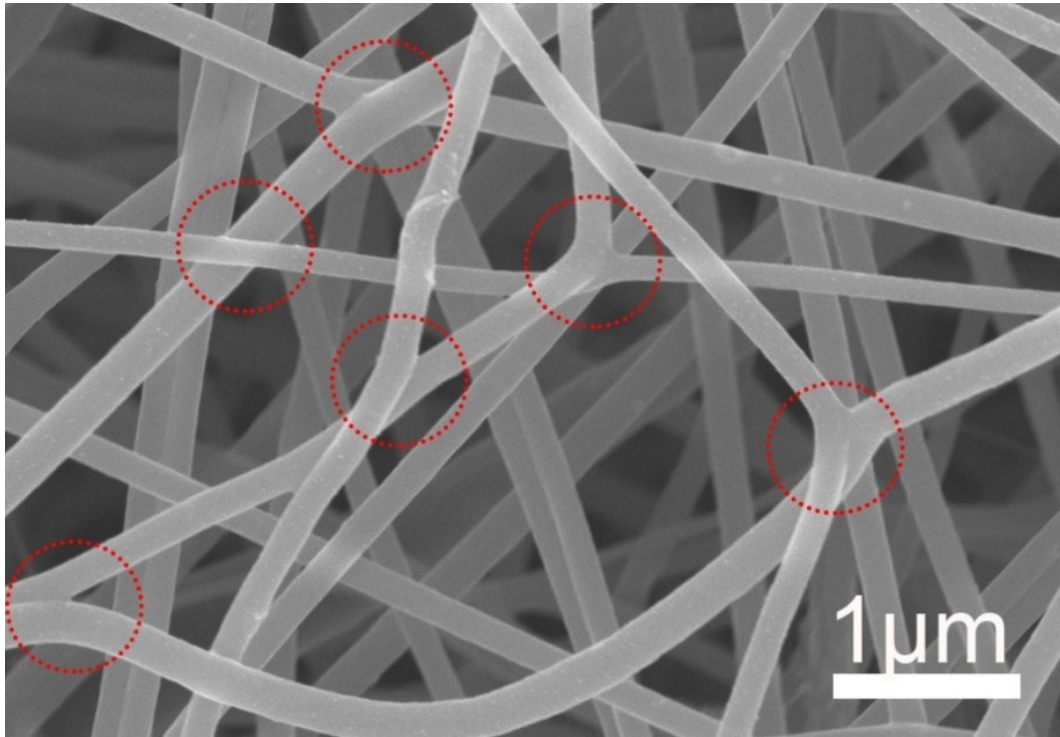

**Figure S4** Crosslinked phenomena of CNFs, which could significantly reduce the contact resistance of the whole film.

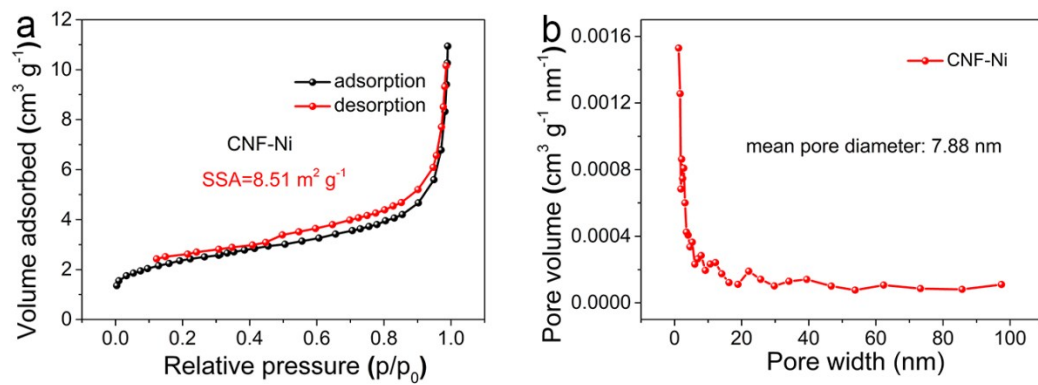

**Figure S5** (a) Adsorption isotherm curves of the CNF-Ni films. The SSAs are calculated as 8.51 m<sup>2</sup> g<sup>-1</sup>. (b) BJH pore size distribution plot of the CNF-Ni film, its pore size distribution is in the range of 1 - 10 nm with an average pore size of 7.88 nm.

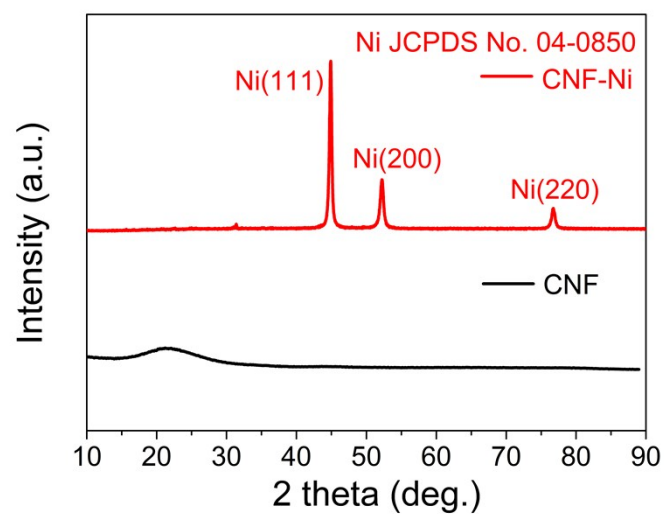

**Figure S6** XRD spectra comparison of CNF and CNF-Ni films.

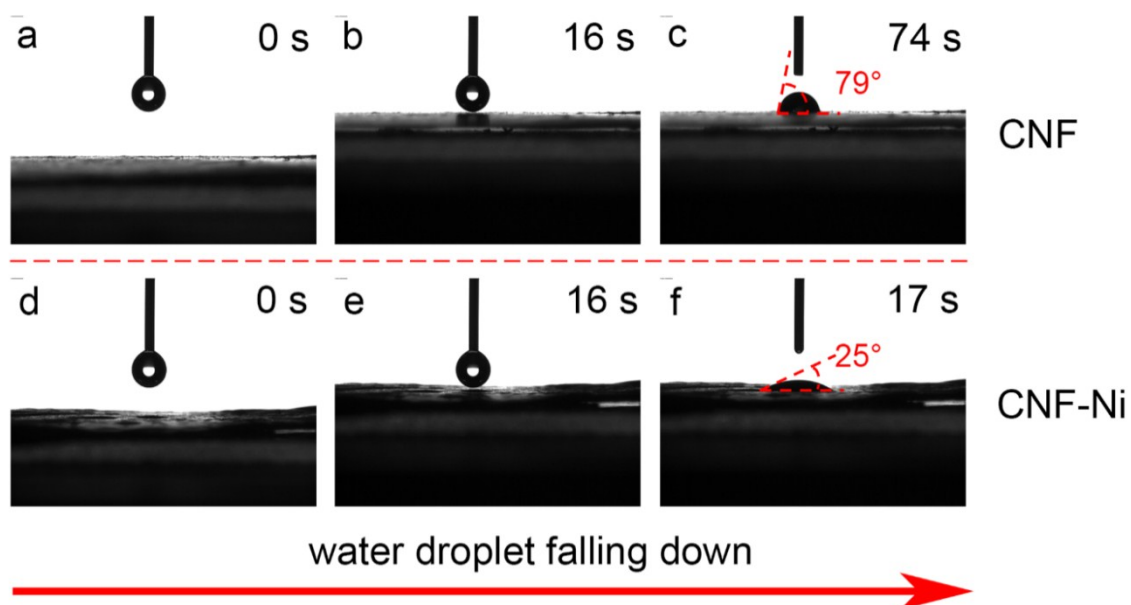

**Figure S7** Water contact angle measurement of the CNF and CNF-Ni surface. From (b) to (c), the time span is within 58 seconds. From (e) to (f), the time span is within 1 second. The contact angles of CNF film and CNF-Ni film indicated the CNF-Ni-based electrodes are super hydrophilic.



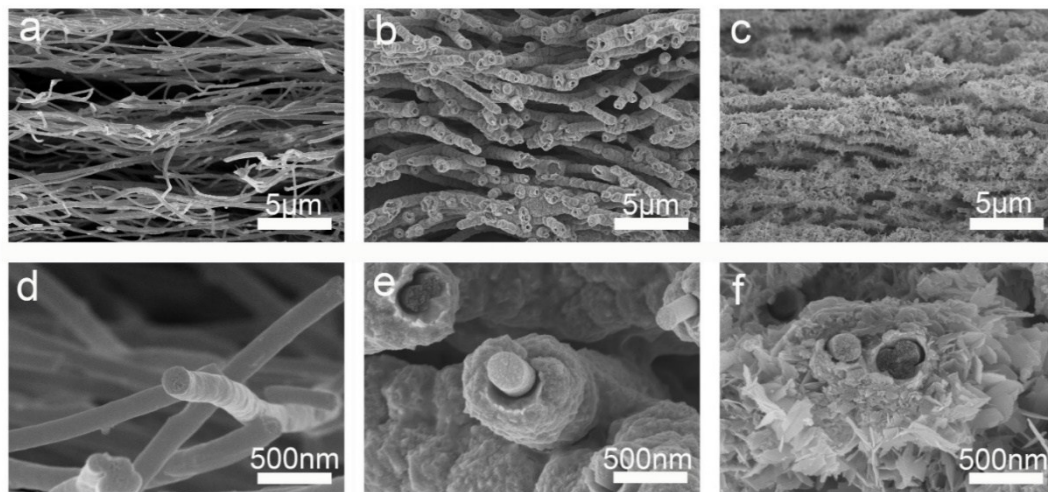

**Figure S8** (a-c) Cross-sectional SEM images of the CNF, CNF-Ni and CNF-Ni@Fe<sub>2</sub>O<sub>3</sub> films, respectively. (d-f) Their enlarged SEM images, respectively.

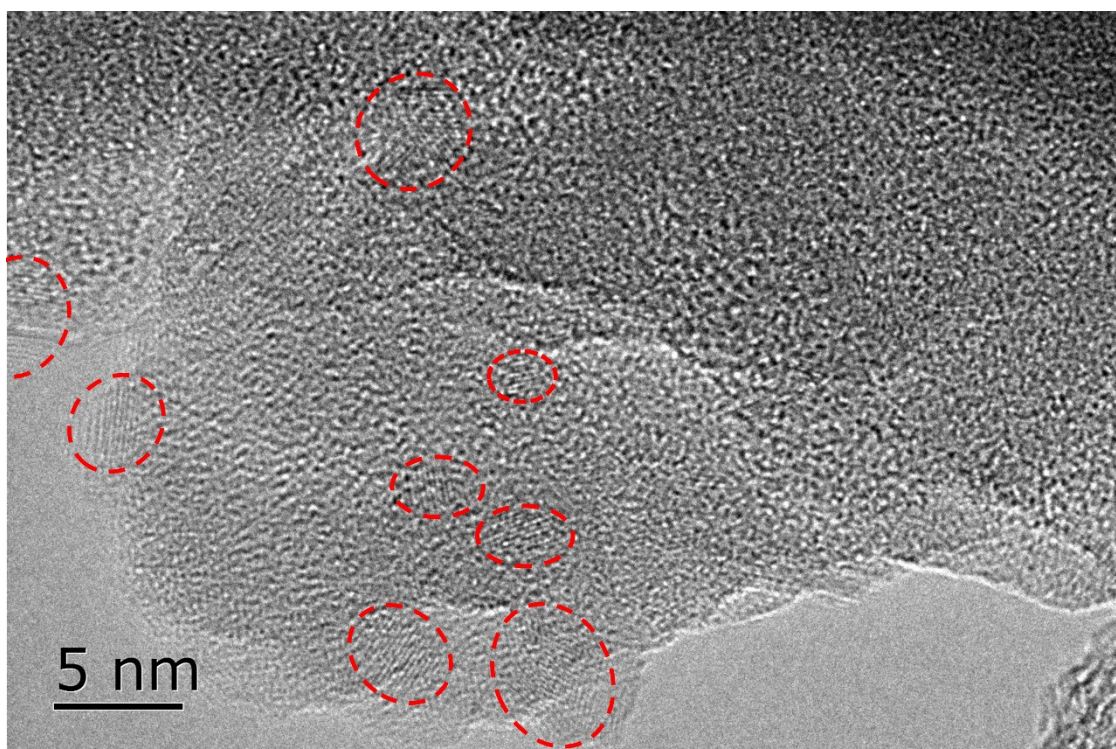

**Figure S9** HR-TEM image of the 2D Fe<sub>2</sub>O<sub>3</sub> suggests that the crystalline in the amorphous heterogeneous structure of Fe<sub>2</sub>O<sub>3</sub>.

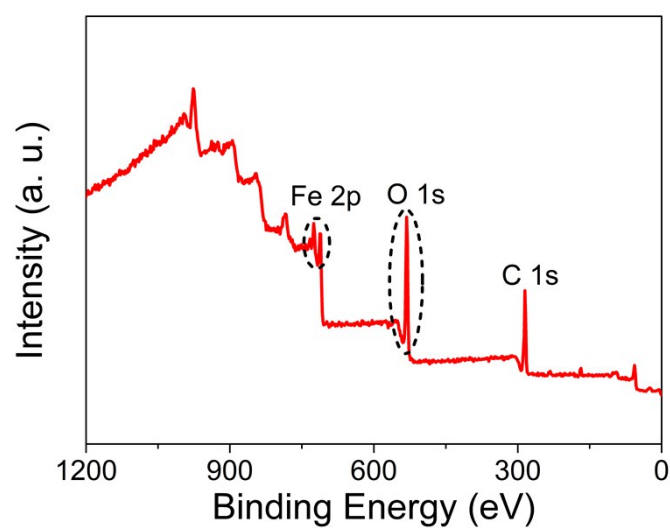

**Figure S10** XPS full spectrum of the 2D Fe<sub>2</sub>O<sub>3</sub>, the C 1s signal at 284.6 eV is used as the reference. The peaks in the range of 740 - 700 eV and 535 - 525 eV are assignable to the Fe 2p and O 1s spectra, respectively.

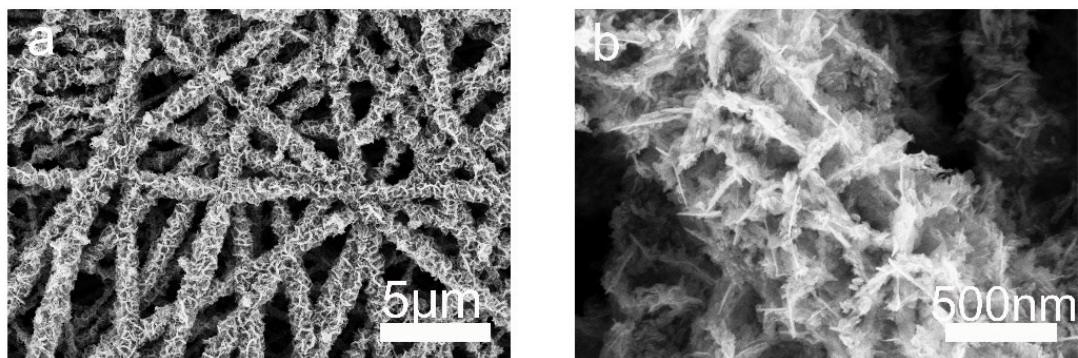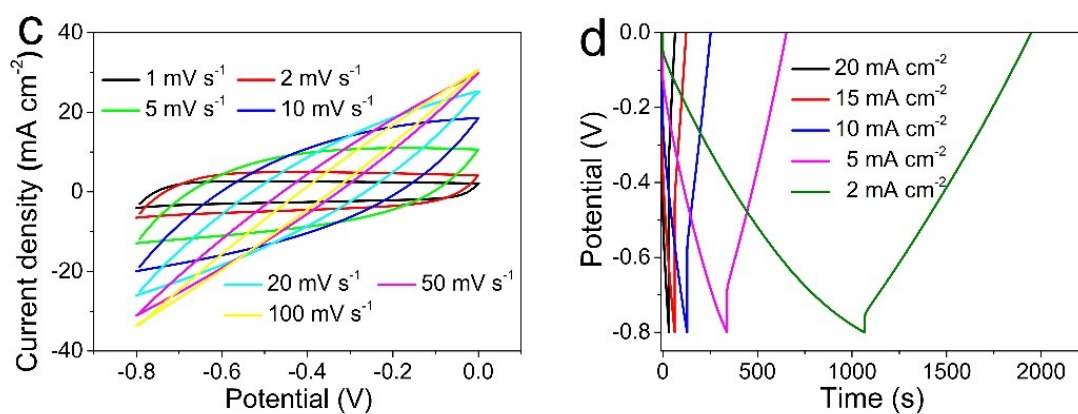

**Figure S11** (a, b) SEM images of the CNF@Fe<sub>2</sub>O<sub>3</sub> electrode. Electrochemical performance of the CNF@Fe<sub>2</sub>O<sub>3</sub> electrode. (c) CV curves at the scan rates ranging from 1 mV s<sup>-1</sup> to 100 mV s<sup>-1</sup>; (d) GCD curves at current densities range of 2 - 20 mA cm<sup>-2</sup>.

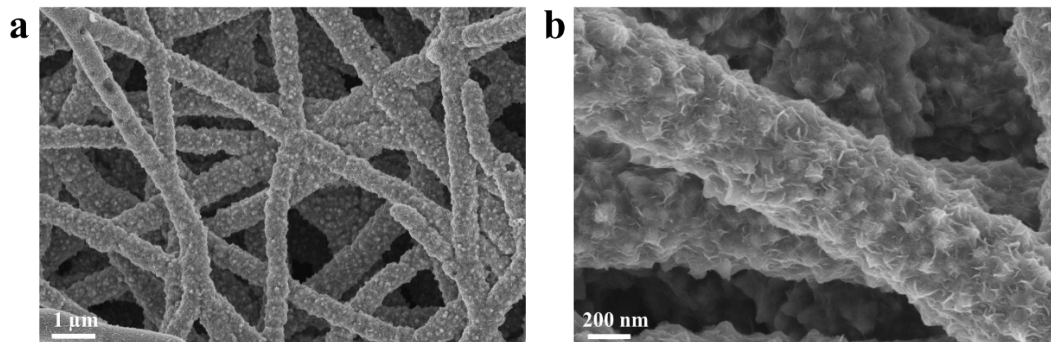

**Figure S12** SEM images of the CNF-Ni@Fe<sub>2</sub>O<sub>3</sub> film after cycling.

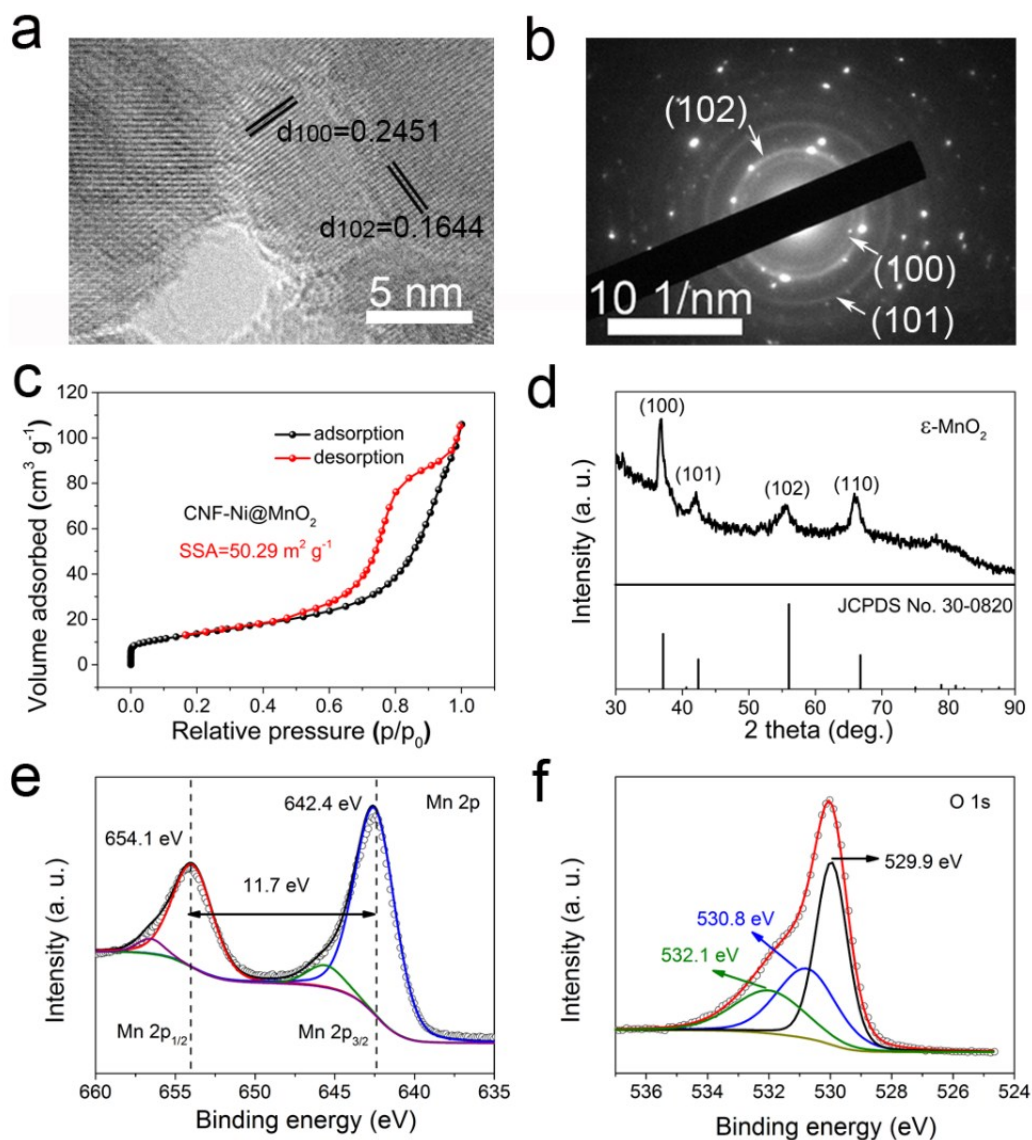

**Figure S13** (a) HR-TEM image and (b) SEAD pattern of  $\text{MnO}_2$ ; (c) Adsorption isotherm curve of the CNF-Ni@ $\text{MnO}_2$  film; (d) XRD spectrum of  $\text{MnO}_2$ ; (e), (f) HR-XPS spectra of Mn 2p and O 1s, respectively.

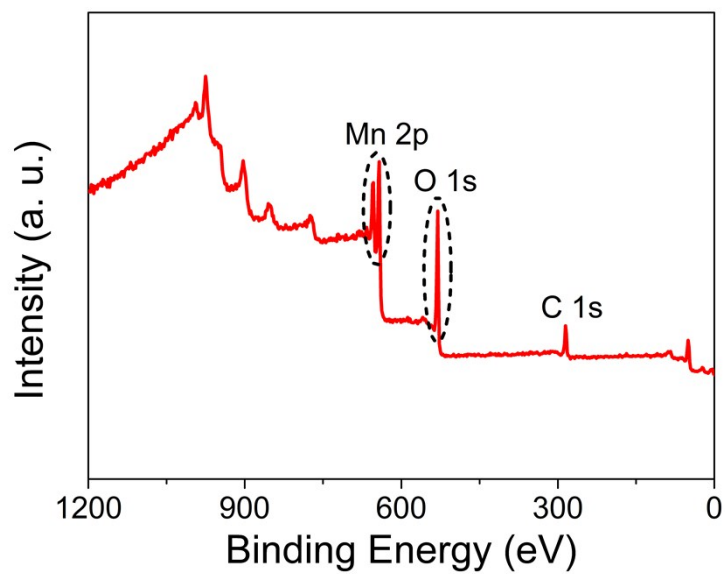

**Figure S14** XPS full spectrum of the 2D MnO<sub>2</sub>. The C 1s signal at 284.6 eV is used as the reference to calibrate the binding energies of Mn and O. The peaks in the range of 660 - 630 eV and 540 - 520 eV are assignable to the Mn 2p and O 1s spectra, respectively.

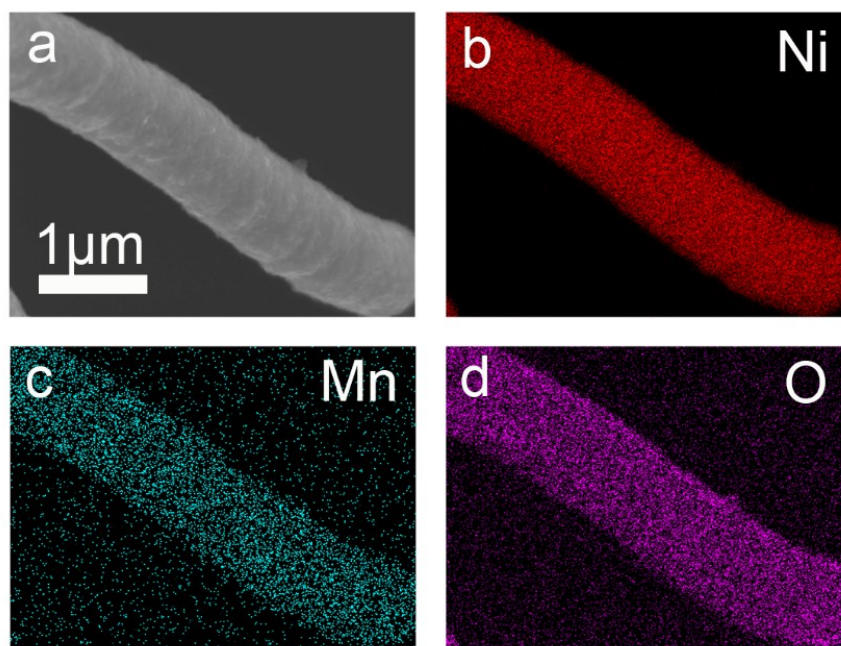

**Figure S15** SEM image (a) of CNF-Ni@MnO<sub>2</sub> fiber combined with energy-dispersive spectroscopy (EDS) mapping in the same area and relative intensities of (b) C, (c) Ni, (d) Mn and (e) O elements, showing that these elements are distributed evenly over the fibers.



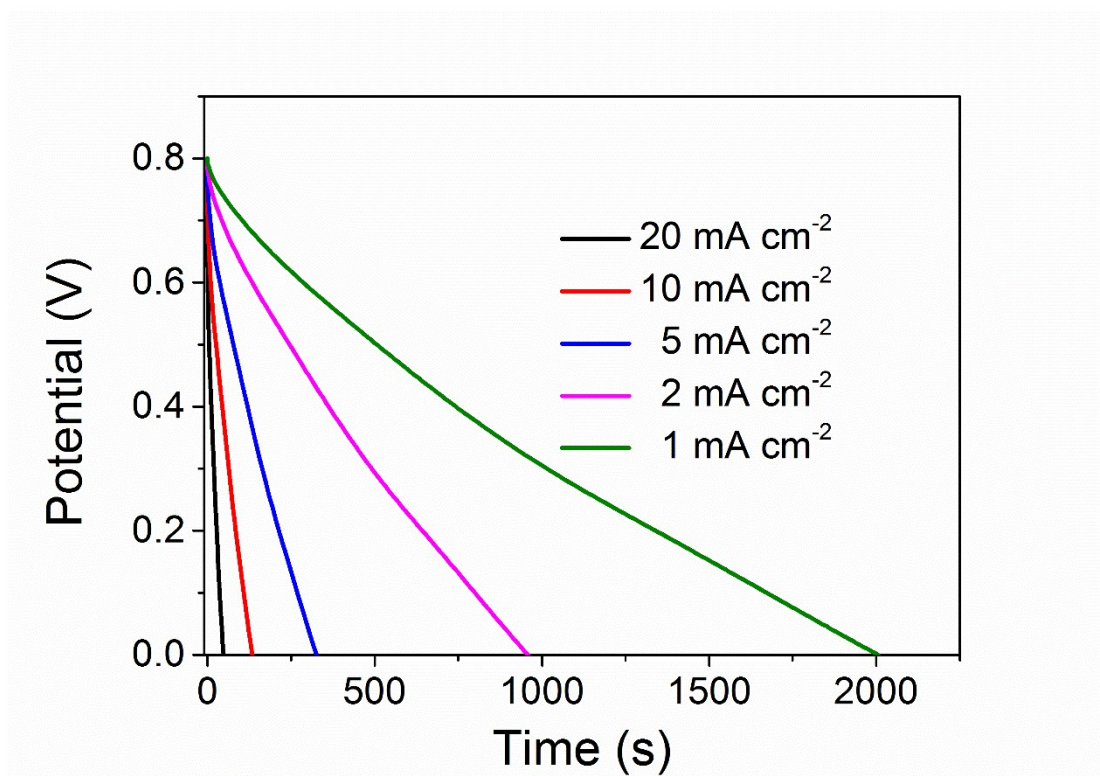

**Figure S16** GCD curves of the CNF-Ni@MnO<sub>2</sub> cathode at different current densities ranging from 1 to 20 mA cm<sup>-2</sup>.

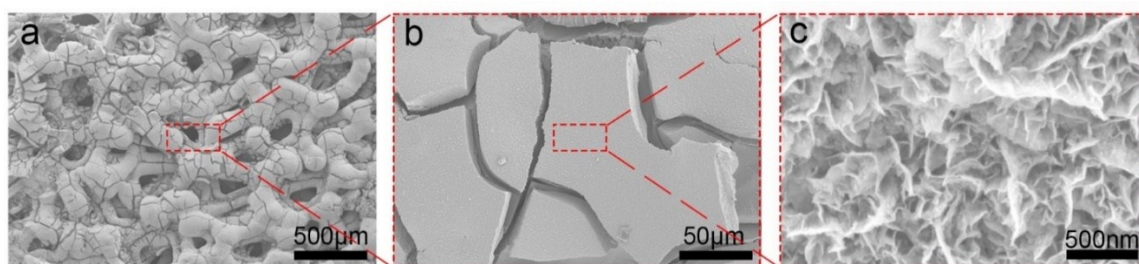

**Figure S17** (a-c) SEM images of NF@MnO<sub>2</sub> at different magnifications. Cracks can be clearly found on the NF@MnO<sub>2</sub> sample surface.

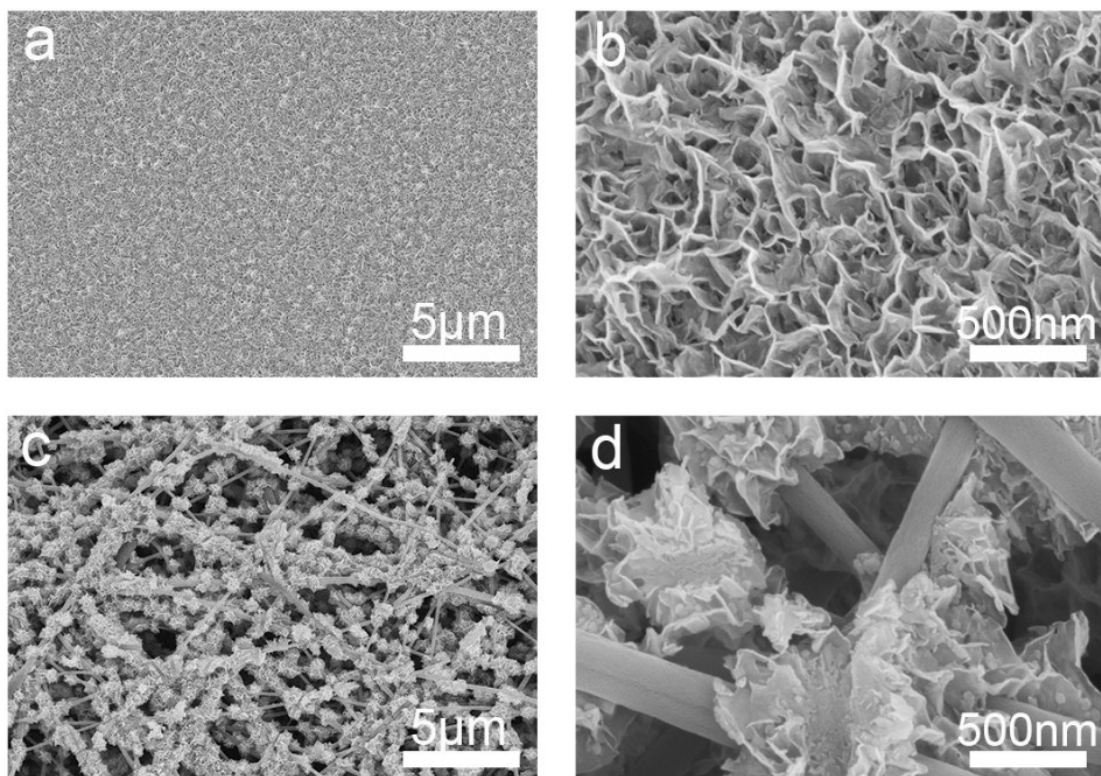

**Figure S18** SEM images of CNF@MnO<sub>2</sub> at different magnifications. (a), (b) The outer part of CNF@MnO<sub>2</sub> sample; (c), (d) the inner part of CNF@MnO<sub>2</sub> sample.

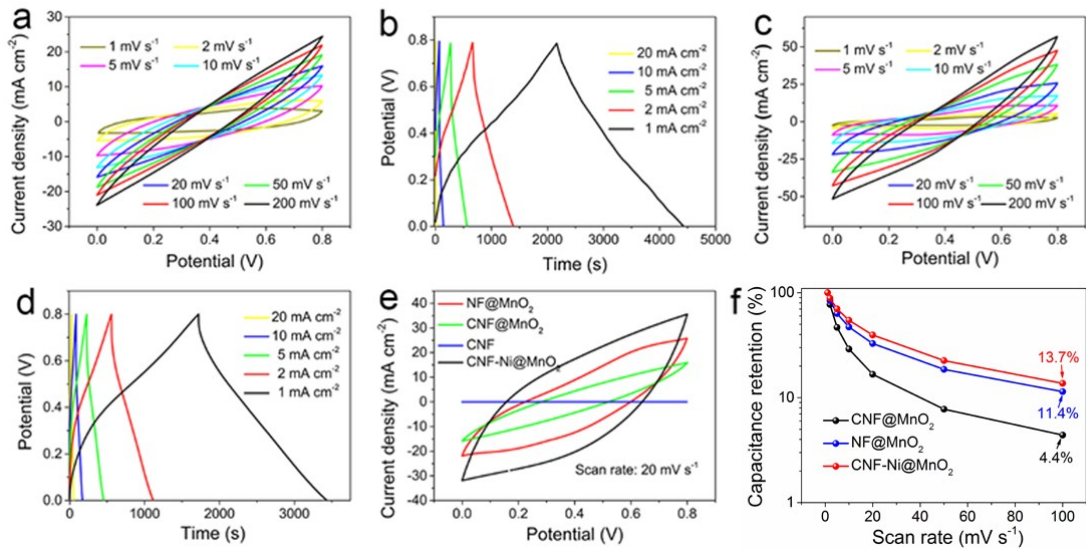

**Figure S19** Electrochemical performance of the CNF@MnO<sub>2</sub> and NF@MnO<sub>2</sub> electrodes. (a) CV curves of CNF@MnO<sub>2</sub> at scan rates of 1 – 200 mV s<sup>-1</sup>; (b) GCD curves of CNF@MnO<sub>2</sub> at current densities ranging from 1 to 20 mA cm<sup>-2</sup>; (c) CV curves of NF@MnO<sub>2</sub> at scan rates of 1 – 200 mV s<sup>-1</sup>; (d) GCD curves of NF@MnO<sub>2</sub> at current densities ranging from 1 to 20 mA cm<sup>-2</sup>; (e) CV curves of CNF film, CNF@MnO<sub>2</sub>, NF@MnO<sub>2</sub> and CNF-Ni@MnO<sub>2</sub> with the same mass loading at 20 mV s<sup>-1</sup> in 0.5 M Na<sub>2</sub>SO<sub>4</sub> electrolyte. The almost negligible CV area of CNF film indicates MnO<sub>2</sub> contribute to most of the capacitance. The larger CV area of CNF-Ni@MnO<sub>2</sub> compared with that of CNF@MnO<sub>2</sub> and NF@MnO<sub>2</sub> demonstrate the higher specific capacitance as the result of conductive scaffold; (f) the capacitance retention versus scan rate with the same mass loading for NF@MnO<sub>2</sub>, CNF@MnO<sub>2</sub>, and CNF-Ni@MnO<sub>2</sub> electrodes.

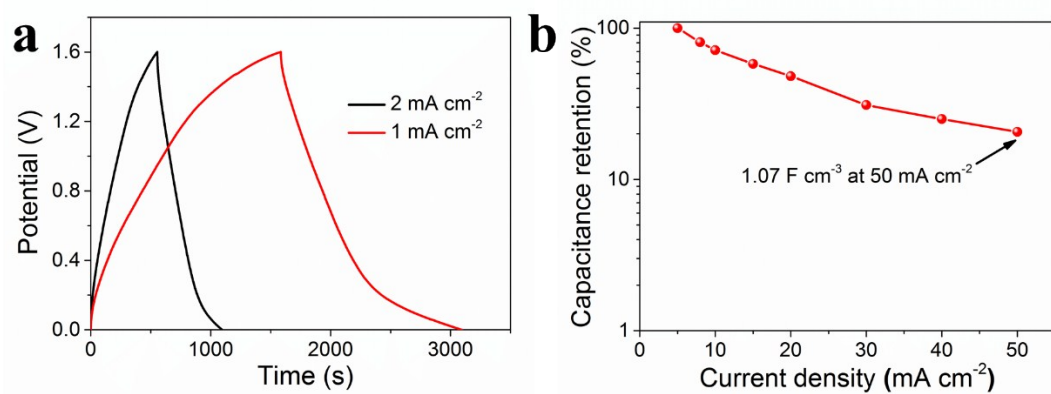

**Fig. S20** (a) GCD curves at current densities of 1 and 2 mA cm<sup>-2</sup>; (b) Capacitance retention value versus current density calculated by GCD curves.

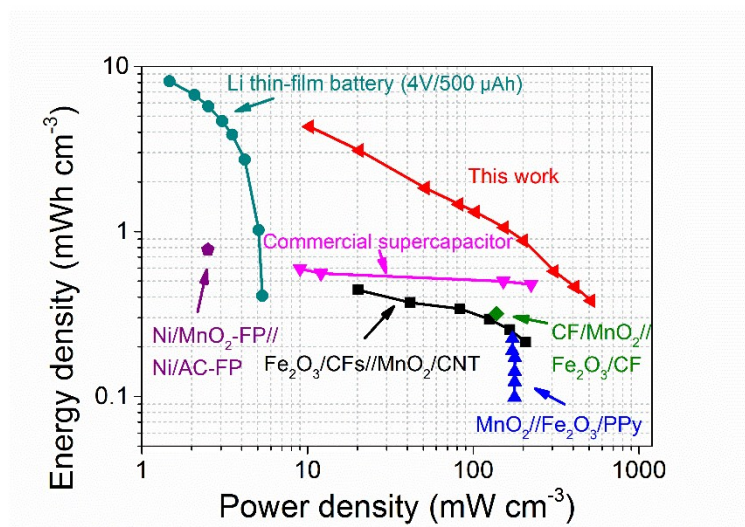

**Fig. S21** Ragone plot of our supercapacitor as compared to other recently-reported ones.

**Table S1.** A comparison of electrochemical properties among some of the recently reported supercapacitors with our work

| Supercapacitors                                                                          | Areal capacitance (F·cm <sup>-2</sup> ) | Volumetric capacitance (F·cm <sup>-3</sup> ) | Power density (mW·cm <sup>-3</sup> ) | Energy density (mWh·cm <sup>-3</sup> ) | Ref.      |
|------------------------------------------------------------------------------------------|-----------------------------------------|----------------------------------------------|--------------------------------------|----------------------------------------|-----------|
| Fe <sub>2</sub> O <sub>3</sub> /CFs//MnO <sub>2</sub> /CNT                               | /                                       | 0.67                                         | 208                                  | 0.44                                   | [1]       |
| Fe <sub>2</sub> O <sub>3</sub> -P//MnO <sub>2</sub>                                      | /                                       | /                                            | 258                                  | 0.42                                   | [2]       |
| RuO <sub>2</sub> //Fe <sub>2</sub> O <sub>3</sub>                                        | 0.06                                    | 4.9                                          | 9.1                                  | 1.5                                    | [3]       |
| α-Fe <sub>2</sub> O <sub>3</sub> /C/α-Fe <sub>2</sub> O <sub>3</sub> /MnO <sub>x</sub>   | /                                       | 1.28                                         | 155                                  | 0.64                                   | [4]       |
| MnO <sub>2</sub> //Fe <sub>2</sub> O <sub>3</sub> /PPy                                   | /                                       | 0.84                                         | 166                                  | 0.22                                   | [5]       |
| Ag-NW/PEDOT:PSS-NP//MnO <sub>2</sub>                                                     | /                                       | 4.64                                         | 369                                  | 0.41                                   | [6]       |
| rGO/CNT//rGO/CNT                                                                         | 0.33                                    | 2                                            | 800                                  | 1.7                                    | [7]       |
| Co <sub>9</sub> S <sub>8</sub> /CC//Co <sub>3</sub> O <sub>4</sub> @RuO <sub>2</sub> /CC | 0.34                                    | 3.42                                         | 890                                  | 1.44                                   | [8]       |
| CNF-Ni@MnO <sub>2</sub> //CNF-Ni@Fe <sub>2</sub> O <sub>3</sub>                          | 0.94                                    | 12.15                                        | 515                                  | 4.32                                   | This work |

## References

1. Y. Li, J. Xu, T. Feng, Q. Yao, J. Xie, and H. Xia, *Advanced Functional Materials*, 2017, 27, 1606728.
2. H. Liang, C. Xia, A.-H. Emwas, D. H. Anjum, X. Miao, and H. N. Alshareef, *Nano Energy*, 2018, 49, 155-162.
3. J. Y. Seok, J. Lee, and M. Yang, *ACS Appl Mater Interfaces*, 2018, 10, 17223-17231.
4. D. Sarkar, S. Pal, S. Mandal, A. Shukla, and D. D. Sarma, *Journal of The Electrochemical Society*, 2017, 164, A2707-A2715.
5. L. Wang, H. Yang, X. Liu, R. Zeng, M. Li, Y. Huang and X. Hu, *Angew Chem Int Ed Engl*, 2017, 56, 1105-1110.
6. Y. Zeng, Y. Han, Y. Zhao, Y. Zeng, M. Yu, Y. Liu, H. Tang, Y. Tong and X. Lu, *Advanced Energy Materials*, 2015, 5, 1402176.
7. X. Lu, Y. Zeng, M. Yu, T. Zhai, C. Liang, S. Xie, M. S. Balogun and Y. Tong, *Adv Mater*, 2014, 26, 3148-3155.
8. X. Tang, R. Jia, T. Zhai, and H. Xia, *ACS Appl Mater Interfaces*, 2015, 7, 27518-27525.
9. S. Yang, X. Song, P. Zhang, and L. Gao, *ACS Appl Mater Interfaces*, 2015, 7, 75-79.
